# Supplementary material for: Hurricane Irma: an unprecedented event over the last 3700 years? Geomorphological changes and sedimentological record in Codrington Lagoon, Barbuda
Source: Copernicus journal article supplement (doi:10.5194/nhess-23-3761-2023), 2023-12-06
Supplement: Supplementary file 1 [file nhess-23-3761-2023-supplement.zip]

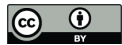

*Supplement of*

**Hurricane Irma: an unprecedented event over the last 3700 years?  
Geomorphological changes and sedimentological  
record in Codrington Lagoon, Barbuda**

**Maude Biguenet et al.**

*Correspondence to:* Maude Biguenet ([maudebiguenet.mb@gmail.com](mailto:maudebiguenet.mb@gmail.com))

- [nhess-23-3761-2023-supplement-title-page.pdf](#)
- Supplementary
  - [Foraminifera\\_observations.xlsx](#)
  - [High\\_Resolution\\_Core\\_Photos](#)
    - \* [BARB1-18-01](#)
    - \* [BARB1-18-02](#)
    - \* [BARB1-18-03.jpg](#)
    - \* [BARB1-18-05.jpg](#)
    - \* [BARB1-18-06.jpg](#)
    - \* [BARB1-18-09.jpg](#)
  - [Seismic\\_traces\\_localization.jpg](#)

The copyright of individual parts of the supplement might differ from the article licence.
